# Supplementary material for: Structural Insight into La0.5Ca0.5Mn0.5Co0.5O3 Decomposition in the Methane Combustion Process
Source: MDPI journal article supplement (doi:10.3390/nano11092283), 2021-09-02

## Supplementary Materials

# Structural Insight into $\text{La}_{0.5}\text{Ca}_{0.5}\text{Mn}_{0.5}\text{Co}_{0.5}\text{O}_3$ Decomposition in the Methane Combustion Process

Olga Nikolaeva, Aleksandr Kapishnikov, Evgeny Gerasimov\*

Boreskov Institute of Catalysis SB RAS, Novosibirsk, 630090, Russia;

ribka-99@mail.ru (O.N.), avl97@mail.ru (A.K.)

\* Correspondence: gerasimov@catalysis.ru (E.G.)

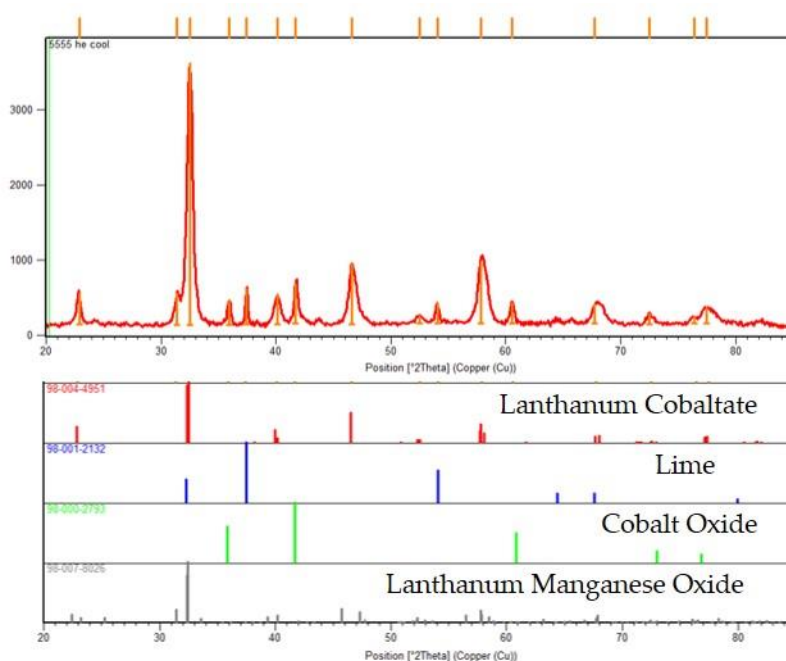

Figure S1. XRD pattern of  $\text{La}_{0.5}\text{Ca}_{0.5}\text{Mn}_{0.5}\text{Co}_{0.5}\text{O}_3$  sample after TGA in He atmosphere.

### Pattern List

| Visible | Ref.Code    | Score | Compound Name       |
|---------|-------------|-------|---------------------|
| red     | 98-004-4951 | 76    | Lanthanum Cobaltate |
| blue    | 98-007-8694 | 52    | Cobalt Oxide        |
| green   | 98-001-2132 | 42    | Lime                |
| gray    | 98-007-8026 | 39    | Lanthanum Manganes  |

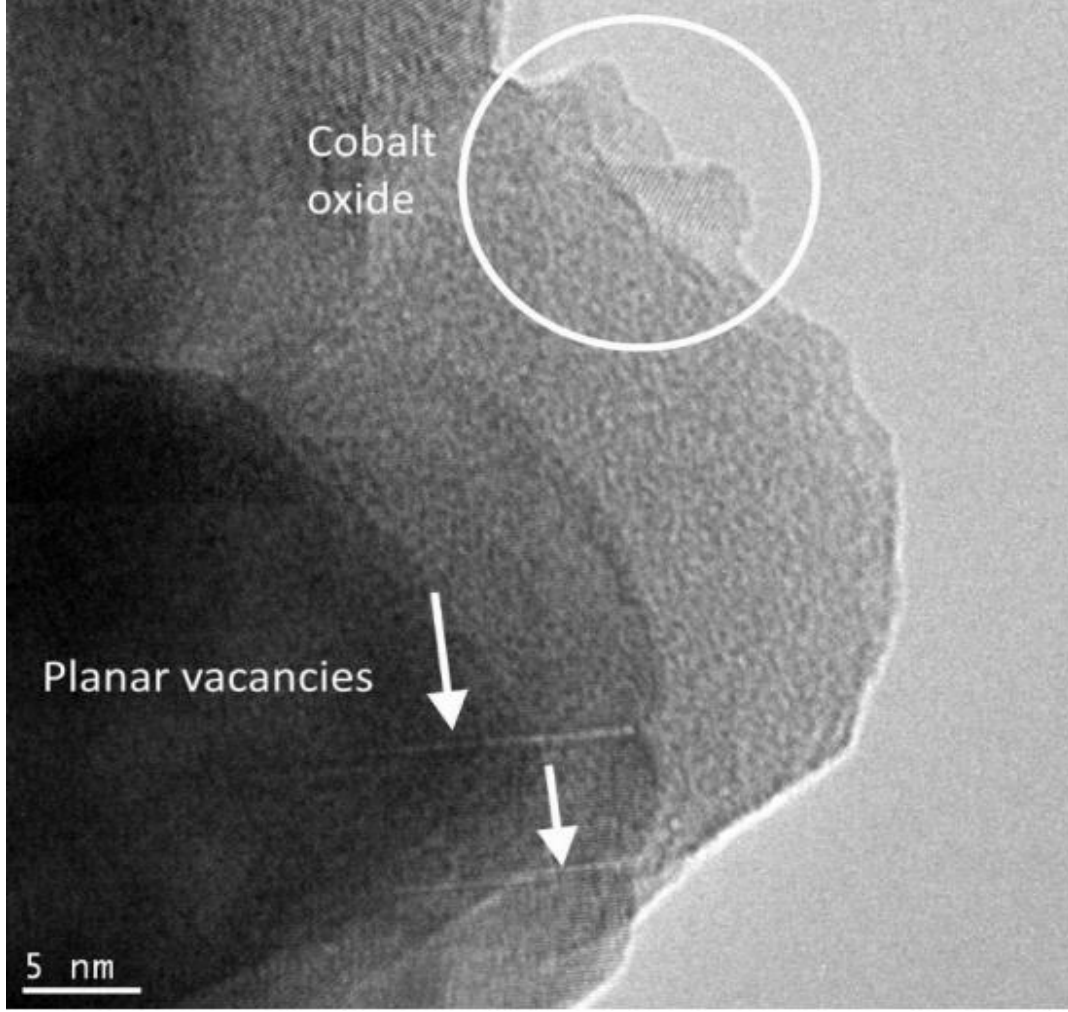

**Figure S2.** HRTEM image of the sample after the reaction. White arrows show planar vacancies.  $\text{Co}_3\text{O}_4$  particles are shown by white circle.

The chemical equations of decomposition process in  $\text{CH}_4$  and He are shown below:

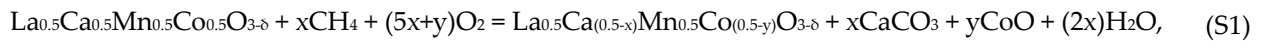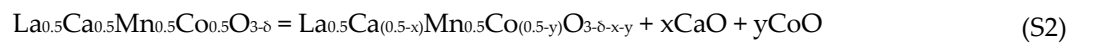

The quasichemical equations of vacancies formation are shown below:

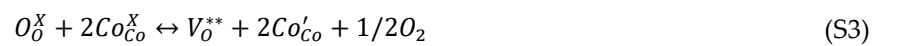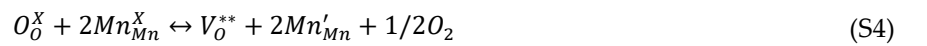

Supplement: s1 [file s1]
